# Supplementary material for: Switching from aerobic glycolysis to oxidative phosphorylation modulates the sensitivity of mantle cell lymphoma cells to TRAIL
Source: Springer Nature journal article supplement (doi:10.1038/onc.2012.13), 2012-02-06
Supplement: 41388_2012_BFonc201213_MOESM10_ESM.pdf [file 41388_2012_BFonc201213_MOESM10_ESM.pdf]

## Supplementary Figures

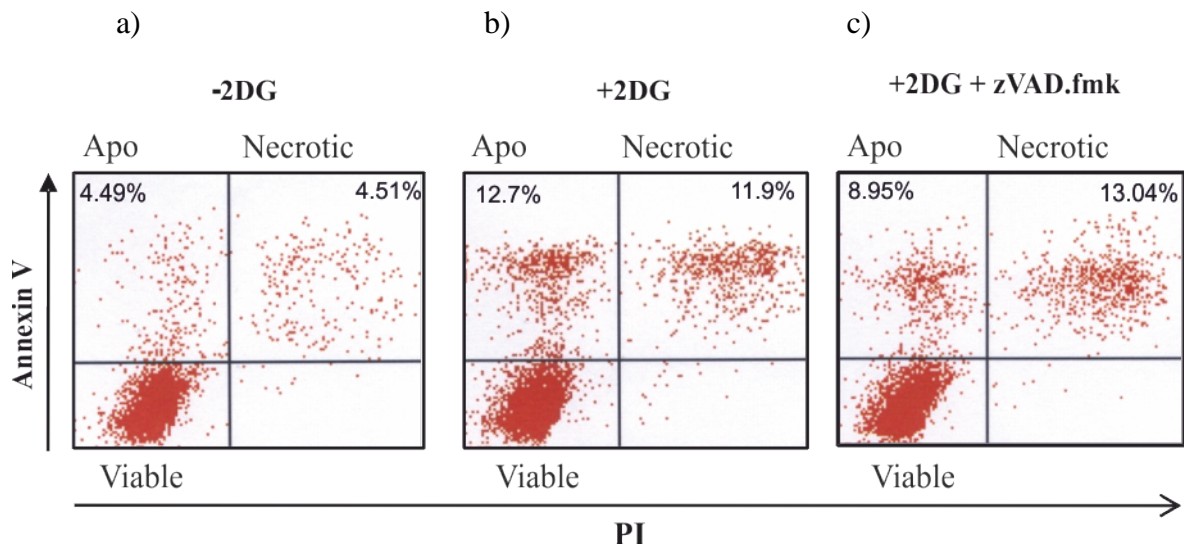

**Figure S1 The effect of zVAD.fmk on 2DG induced cell death.** Cells were incubated with or without 5mM 2DG plus or minus 20  $\mu$ M zVAD.fmk for 20 h and assessed for cell death by flow cytometry with Annexin V and PI fluorescence as described in the Supplementary Materials and Methods.
