# Supplementary material for: Switching from aerobic glycolysis to oxidative phosphorylation modulates the sensitivity of mantle cell lymphoma cells to TRAIL
Source: Springer Nature journal article supplement (doi:10.1038/onc.2012.13), 2012-02-06
Supplement: 41388_2012_BFonc201213_MOESM11_ESM.pdf [file 41388_2012_BFonc201213_MOESM11_ESM.pdf]

## Supplementary Figures

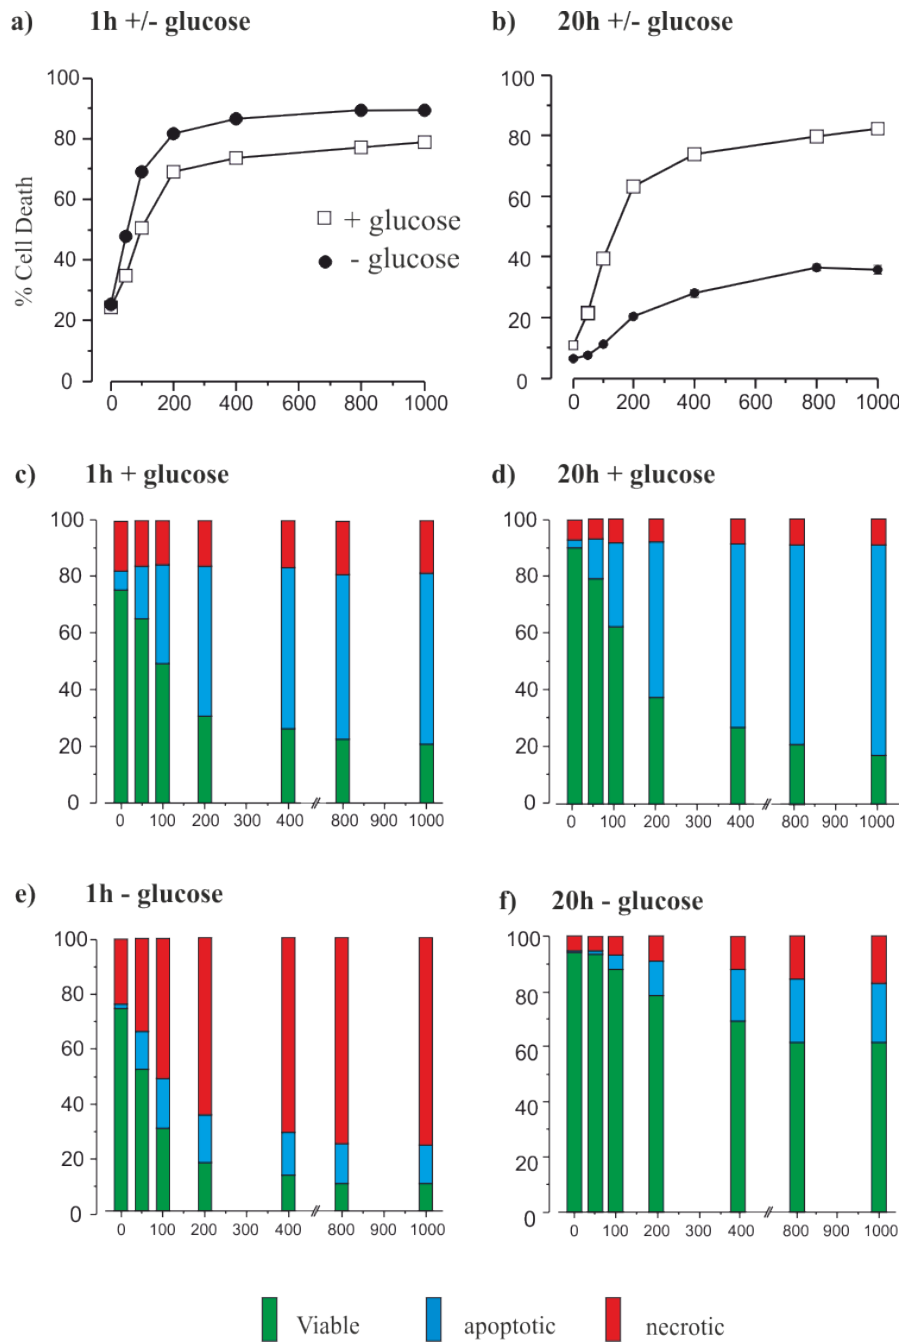

**Figure S2 Time-dependent effect of glucose deprivation on TRAIL-induced cell death.** Cells were incubated with or without glucose for 1h or 20 h and then assessed for cell death by flow cytometry with Annexin V and PI fluorescence as described in the Materials and Methods.
