# Supplementary material for: Switching from aerobic glycolysis to oxidative phosphorylation modulates the sensitivity of mantle cell lymphoma cells to TRAIL
Source: Springer Nature journal article supplement (doi:10.1038/onc.2012.13), 2012-02-06
Supplement: 41388_2012_BFonc201213_MOESM12_ESM.pdf [file 41388_2012_BFonc201213_MOESM12_ESM.pdf]

## Supplementary Figures

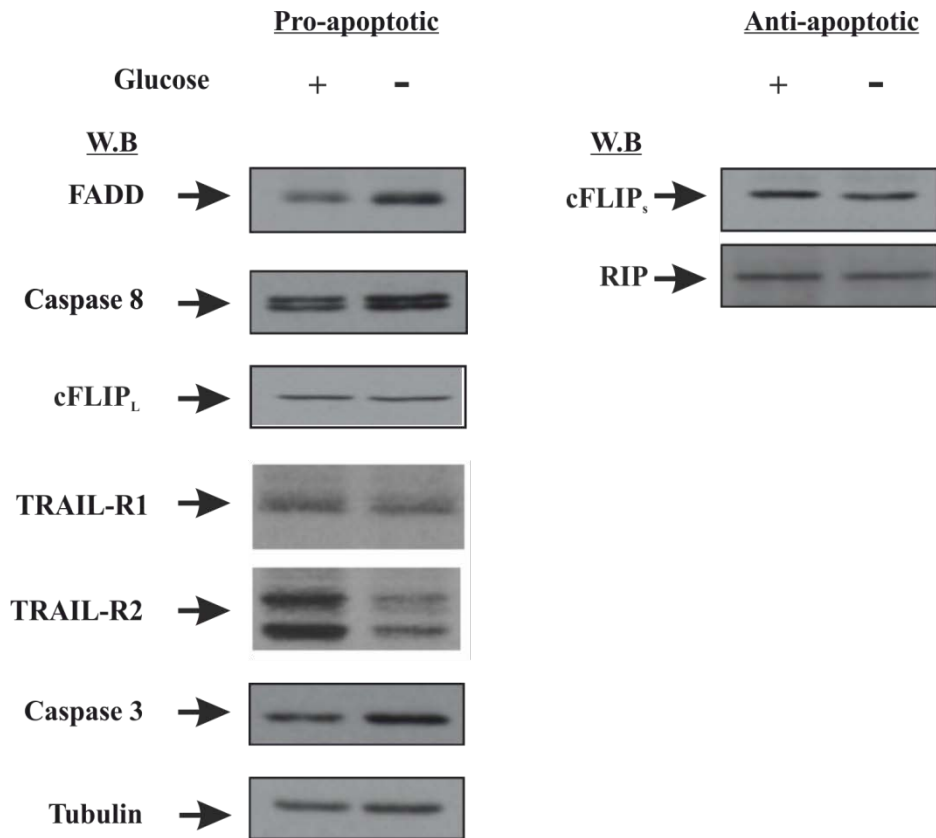

**Figure S3 Protein expression levels of key pro- and anti-apoptotic proteins involved in the extrinsic cell death pathway.** Whole cell lysates from Z138 cells grown in the presence (+) or absence (-) of glucose for a minimum of 1 week prepared and immunoblotted for the indicated pro- and anti-apoptotic proteins as described in Supplementary Materials and Methods. Tubulin was used as a loading control and immunoblots are representative of three independent experiments. Note that cFLIP<sub>L</sub> is shown here as an anti-apoptotic protein but in certain tumor cell lines and cellular contexts this may not be the case.
