# Supplementary material for: Switching from aerobic glycolysis to oxidative phosphorylation modulates the sensitivity of mantle cell lymphoma cells to TRAIL
Source: Springer Nature journal article supplement (doi:10.1038/onc.2012.13), 2012-02-06
Supplement: 41388_2012_BFonc201213_MOESM13_ESM.pdf [file 41388_2012_BFonc201213_MOESM13_ESM.pdf]

## Supplementary Figures

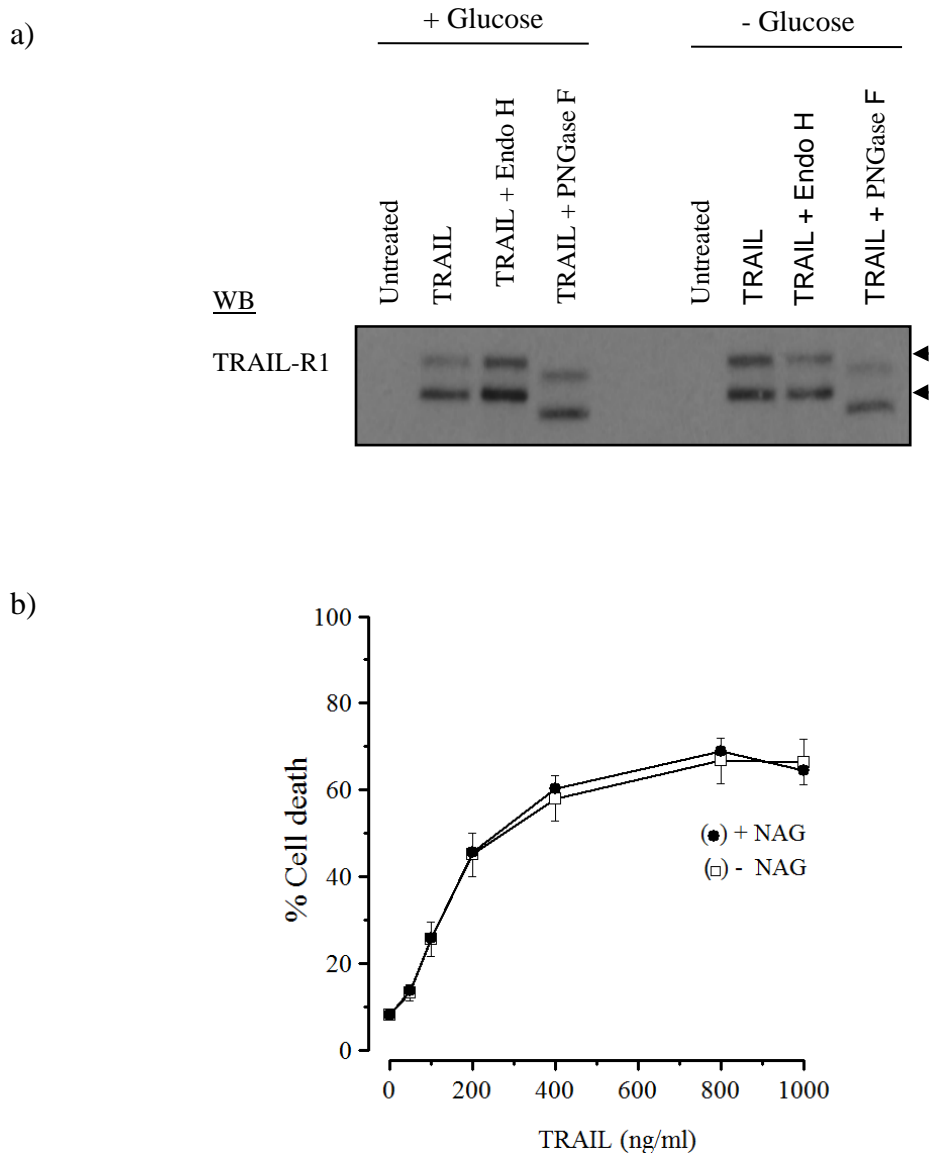

**Figure S4 Glycosylation of TRAIL –R1 in Z138 cells is maintained when cells are grown under in glucose-free conditions.** a) TRAIL-R1 DISC was isolated from Z138 cells grown with or without glucose and and treated with the endoglycosidase enzymes, Endo H (cleaves oligomannose and hybrid glycans) and PNGase F (cleaves linker between core GlcNaAc and asparagine residues) as described in Supplementary Materials and Methods. Immunoblots are representative of three independent experiments. Position of glycosylated TRAIL-R1 proteins is indicated with arrows. b) Glucose-free grown Z138 cells were pre-incubated with (●) or without (□) N-acetylglucosamine (NAG) for 2 h followed by 4 h with various concentrations of TRAIL (0-1000 ng/ml) and assessed for cell death as described in Supplementary Methods. Data for –NAG is average of two experiments and + NAG is mean  $\pm$  SEM (n =3).
