# Supplementary material for: Switching from aerobic glycolysis to oxidative phosphorylation modulates the sensitivity of mantle cell lymphoma cells to TRAIL
Source: Springer Nature journal article supplement (doi:10.1038/onc.2012.13), 2012-02-06
Supplement: 41388_2012_BFonc201213_MOESM14_ESM.pdf [file 41388_2012_BFonc201213_MOESM14_ESM.pdf]

## Supplementary Figures

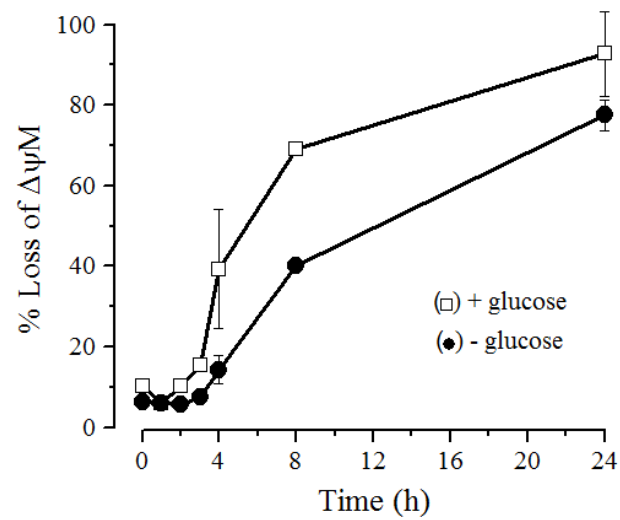

**Figure S5 Z138 cells cultured in glucose-free media are less sensitive to cell killing with ionizing radiation.** Z138 cells cultured with or without glucose were irradiated with 35 Gy and apoptotic cell death assessed by loss of  $\Delta\psi_M$  as described in the Supplementary Methods. The x-axis denotes time post irradiation and results are shown from 1-3 experiments where appropriate (mean  $\pm$  S.E.M for  $n=3$ ), error bars are shown.
